# Supplementary material for: Genomic diversity and population structure of the indigenous Greek and Cypriot cattle populations
Source: PubMed Central journal article supplement (PMC7391618; doi:10.1186/s12711-020-00560-8), 2020-07-29

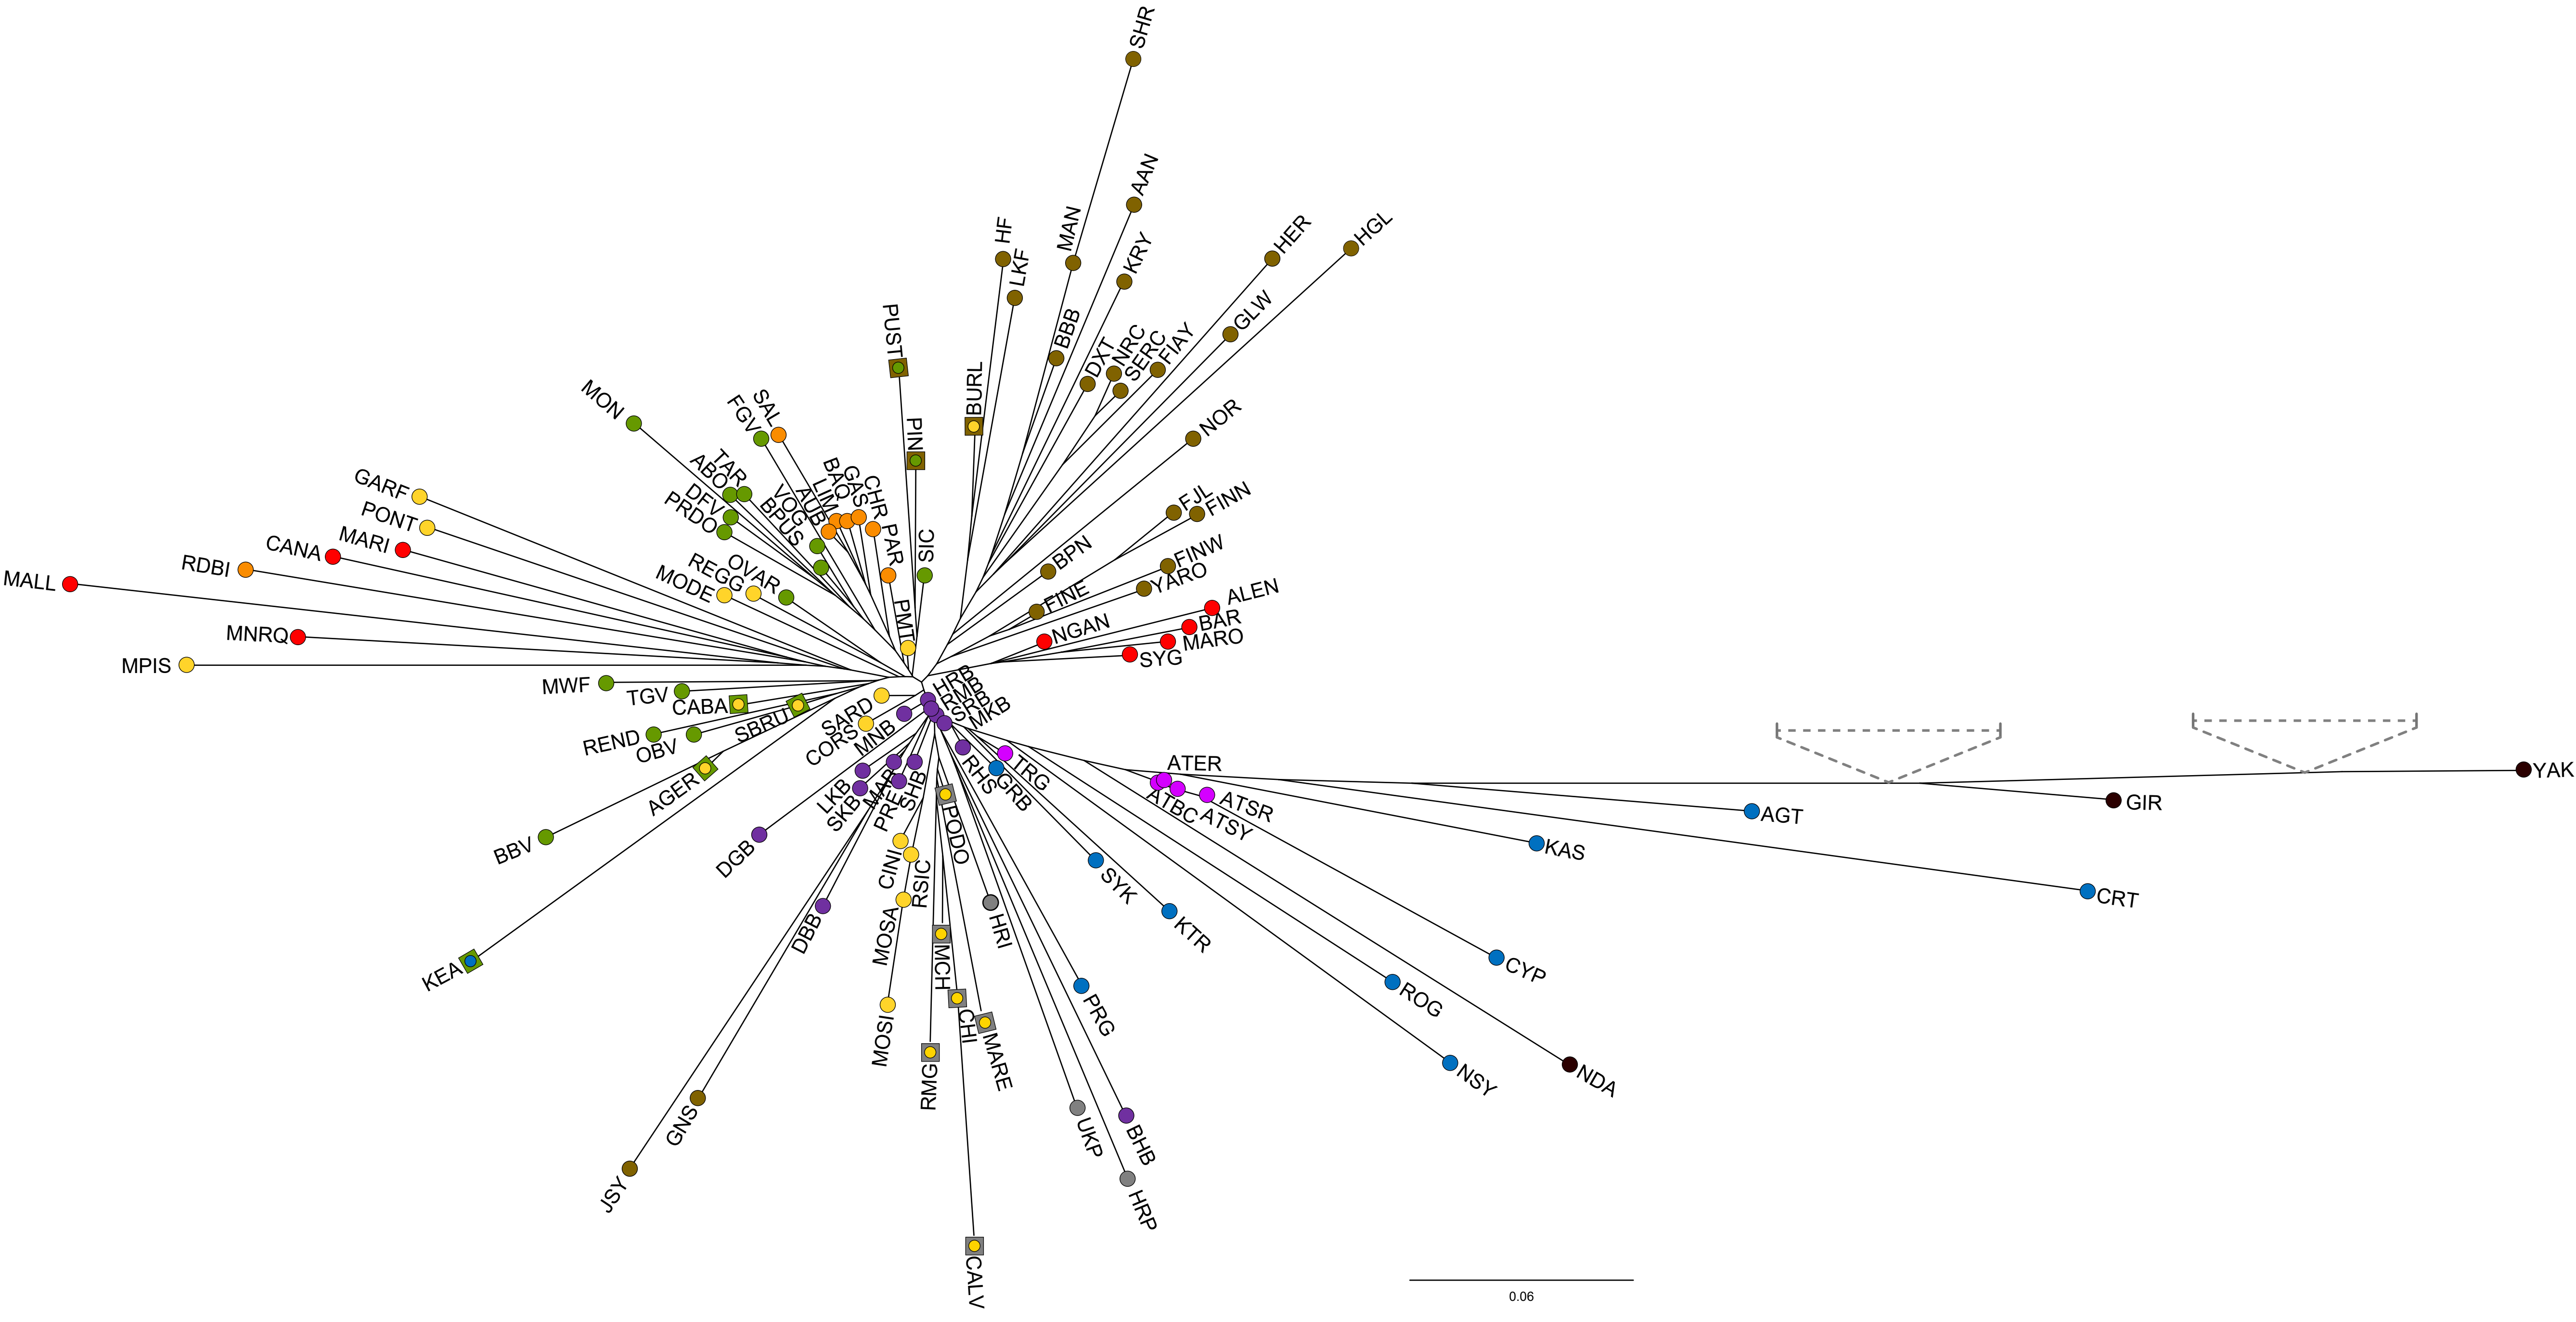

Supplement: 12711_2020_560_MOESM7_ESM.pdf [file 12711_2020_560_MOESM7_ESM.pdf]
